# Supplementary material for: Molecular Distributions of Soluble Oxidation Products from Coals Characterized by Mass Spectrometers
Source: Hindawi journal article supplement (doi:10.1155/2018/5174172), 2018-01-01
Supplement: f1 [file 5174172.f1.pdf]

## Supplemental Information

**Table S1 MCAs detected in the products from coal oxidation**

| peak      | MCAs                                  | SLL | SFB | JCA |
|-----------|---------------------------------------|-----|-----|-----|
| <b>1</b>  | butanoic acid                         | ×   | ×   |     |
| <b>2</b>  | chloroacetic acid                     | ×   | ×   | ×   |
| <b>3</b>  | 2-chloropropanoic acid                |     | ×   |     |
| <b>4</b>  | pentanoic acid                        | ×   | ×   |     |
| <b>5</b>  | dichloroacetic acid                   | ×   | ×   | ×   |
| <b>6</b>  | 2,2-dichloropropanoic acid            | ×   | ×   | ×   |
| <b>7</b>  | 2-chlorobutanoic acid                 | ×   | ×   |     |
| <b>9</b>  | trichloroacetic acid                  | ×   | ×   | ×   |
| <b>10</b> | hexanoic acid                         | ×   | ×   |     |
| <b>11</b> | 2,2-dichlorobutanoic acid             | ×   | ×   |     |
| <b>13</b> | heptanoic acid                        | ×   | ×   |     |
| <b>15</b> | 2,3,3-trichloroacrylic acid           | ×   | ×   |     |
| <b>16</b> | 2,2-dichloro-3-methylbutanoic acid    |     | ×   |     |
| <b>17</b> | 2,2-dichloropentanoic acid            | ×   | ×   |     |
| <b>20</b> | 3,5-dimethylheptanoic acid            | ×   | ×   |     |
| <b>22</b> | 2,2,3-trichlorobutanoic acid          | ×   | ×   |     |
| <b>25</b> | 2-chloroheptanoic acid                |     | ×   |     |
| <b>26</b> | 2,2,3,3-tetrachloropropanoic acid     | ×   | ×   |     |
| <b>28</b> | nonanoic acid                         |     | ×   |     |
| <b>29</b> | 2,2,3-trichloro-3-methylbutanoic acid |     | ×   |     |
| <b>32</b> | 4-methylnonanoic acid                 | ×   | ×   |     |
| <b>33</b> | decanoic acid                         | ×   | ×   |     |
| <b>34</b> | 2,2,3-trichloropentanoic acid         |     | ×   |     |
| <b>35</b> | 2,2-dichlorooctanoic acid             | ×   | ×   |     |
| <b>41</b> | 9-methyldecanoic acid                 | ×   |     |     |
| <b>43</b> | dodecanoic acid                       | ×   | ×   |     |
| <b>49</b> | tetradecanoic acid                    | ×   |     |     |
| <b>59</b> | palmitic acid                         | ×   | ×   |     |

**Table S2 DCAs detected in the products from coal oxidation**

| peak      | DCAs                                    | SLL | SFB | JCA |
|-----------|-----------------------------------------|-----|-----|-----|
| <b>14</b> | succinic acid                           | ×   |     |     |
| <b>18</b> | 2-methylsuccinic acid                   | ×   | ×   |     |
| <b>19</b> | 2-chloro-2-methylmalonic acid           | ×   | ×   |     |
| <b>23</b> | 2-chlorosuccinic acid                   | ×   | ×   |     |
| <b>24</b> | glutaric acid                           | ×   | ×   |     |
| <b>27</b> | 2,3-dichlorosuccinic acid               | ×   | ×   |     |
| <b>36</b> | heptanedioic acid                       | ×   | ×   |     |
| <b>40</b> | 2-chloro-3-(dichloromethyl)fumaric acid | ×   | ×   |     |
| <b>45</b> | nonanedioic acid                        |     | ×   |     |
| <b>47</b> | decanedioic acid                        |     | ×   |     |
| <b>51</b> | undecanedioic acid                      | ×   | ×   |     |

**Table S3 BCAs detected in the products from coal oxidation**

| peak | BCAs                                                  | SLL | SFB | JCA |
|------|-------------------------------------------------------|-----|-----|-----|
| 21   | benzoic acid                                          | ×   | ×   |     |
| 30   | 3-chlorobenzoic acid                                  |     | ×   |     |
| 31   | 4-chlorobenzoic acid                                  |     | ×   |     |
| 37   | 2-chloro-4-methylbenzoic acid                         |     | ×   |     |
| 39   | phthalic acid                                         | ×   | ×   | ×   |
| 42   | isophthalic acid                                      |     | ×   |     |
| 44   | 2,5-dichloro-4-methylbenzoic acid                     |     | ×   |     |
| 46   | 3-chlorophthalic acid                                 |     | ×   | ×   |
| 48   | 4-chlorophthalic acid                                 |     | ×   |     |
| 50   | 4-chloro-5-methylphthalic acid                        | ×   | ×   |     |
| 52   | 4-chloro-5-ethylphthalic acid                         | ×   | ×   |     |
| 53   | 4-chloro-5-isopropylphthalic acid                     |     | ×   |     |
| 54   | 2,3,4-trichloro-5,6-dimethylbenzoic acid              |     | ×   |     |
| 55   | benzene-1,2,3-tricarboxylic acid                      | ×   | ×   | ×   |
| 56   | benzene-1,2,4-tricarboxylic acid                      | ×   | ×   | ×   |
| 57   | 3,5-dichloro-4-methylphthalic acid                    |     | ×   |     |
| 58   | benzene-1,3,5-tricarboxylic acid                      |     | ×   |     |
| 62   | 4-chlorobenzene-1,2,3-tricarboxylic acid              | ×   | ×   | ×   |
| 63   | 5-methylbenzene-1,2,4-tricarboxylic acid              |     | ×   |     |
| 64   | 6-chlorobenzene-1,2,4-tricarboxylic acid              | ×   | ×   | ×   |
| 65   | 6-chloro-5-methylbenzene-1,2,4-tricarboxylic acid     | ×   | ×   |     |
| 66   | benzene-1,2,3,4-tetracarboxylic acid                  | ×   | ×   | ×   |
| 67   | benzene-1,2,3,5-tetracarboxylic acid                  | ×   | ×   | ×   |
| 68   | benzene-1,2,4,5-tetracarboxylic acid                  | ×   | ×   | ×   |
| 69   | 5-chlorobenzene-1,2,3,4-tetracarboxylic acid          | ×   | ×   | ×   |
| 70   | 3-chlorobenzene-1,2,4,5-tetracarboxylic acid          |     | ×   | ×   |
| 71   | 5-chloro-6-methylbenzene-1,2,3,4-tetracarboxylic acid | ×   | ×   |     |
| 74   | benzene-1,2,3,4,5-pentacarboxylic acid                | ×   | ×   | ×   |
| 75   | 6-chlorobenzene-1,2,3,4,5-pentacarboxylic acid        |     | ×   | ×   |
| 77   | benzene-1,2,3,4,5,6-hexacarboxylic acid               | ×   | ×   | ×   |

**Table S4 HCs detected in the products from coal oxidation**

| peak      | HCs            | SLL | SFB | JCA |
|-----------|----------------|-----|-----|-----|
| <b>60</b> | icosane        | ×   | ×   |     |
| <b>61</b> | henicosane     |     | ×   |     |
| <b>72</b> | tricosane      | ×   | ×   | ×   |
| <b>73</b> | tetracosane    | ×   | ×   | ×   |
| <b>76</b> | pentacosane    | ×   | ×   | ×   |
| <b>78</b> | hexacosane     | ×   | ×   | ×   |
| <b>79</b> | heptacosane    | ×   | ×   | ×   |
| <b>80</b> | octacosane     | ×   | ×   | ×   |
| <b>81</b> | nonacosane     | ×   | ×   | ×   |
| <b>82</b> | triacontane    |     | ×   |     |
| <b>83</b> | hentriacontane |     | ×   |     |
| <b>84</b> | dotriacontane  |     | ×   |     |

**Table S5 OSs detected in the products from coal oxidation**

| peak      | OSs                              | SLL | SFB | JCA |
|-----------|----------------------------------|-----|-----|-----|
| <b>8</b>  | ethyl 2,2-dichloroacetate        | ×   | ×   | ×   |
| <b>12</b> | ethyl 2,2,2-trichloroacetate     | ×   | ×   | ×   |
| <b>38</b> | propane-1,2,3-tricarboxylic acid | ×   | ×   |     |

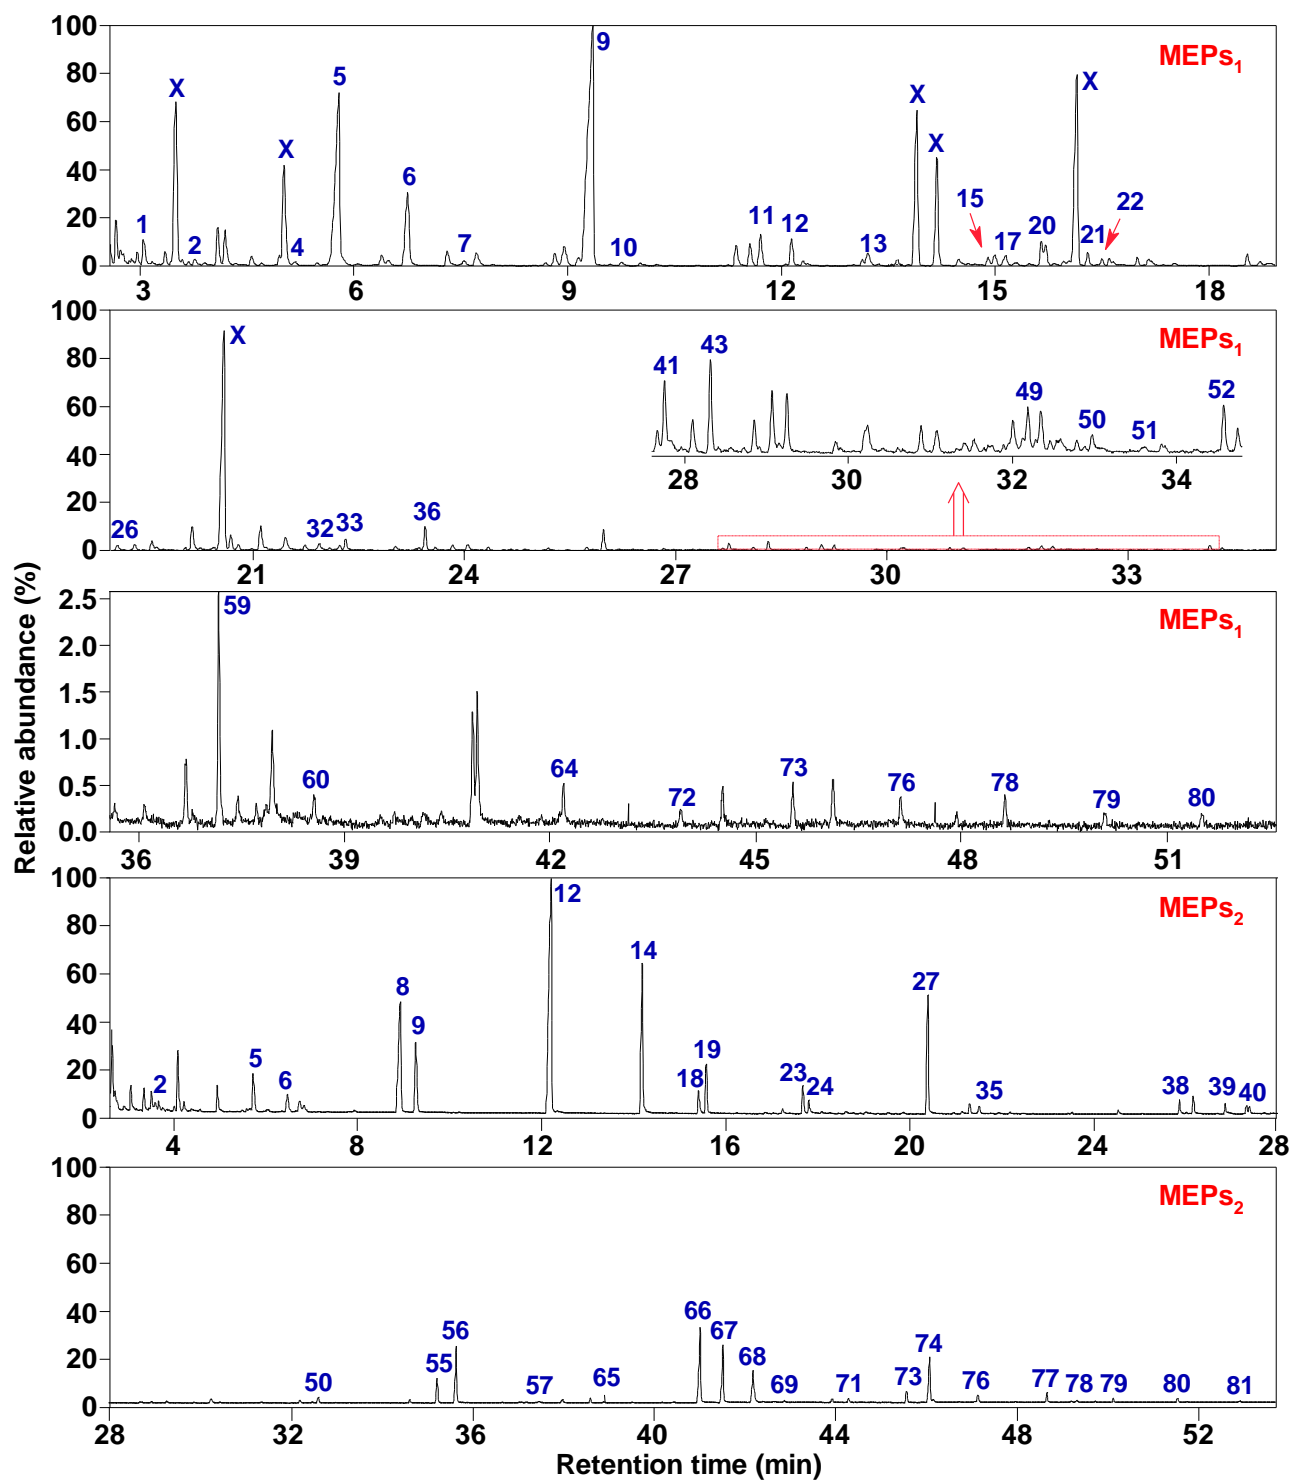

**Figure S1** Total ion chromatograms of  $P_{SLL}$  (X stands for unknown species)

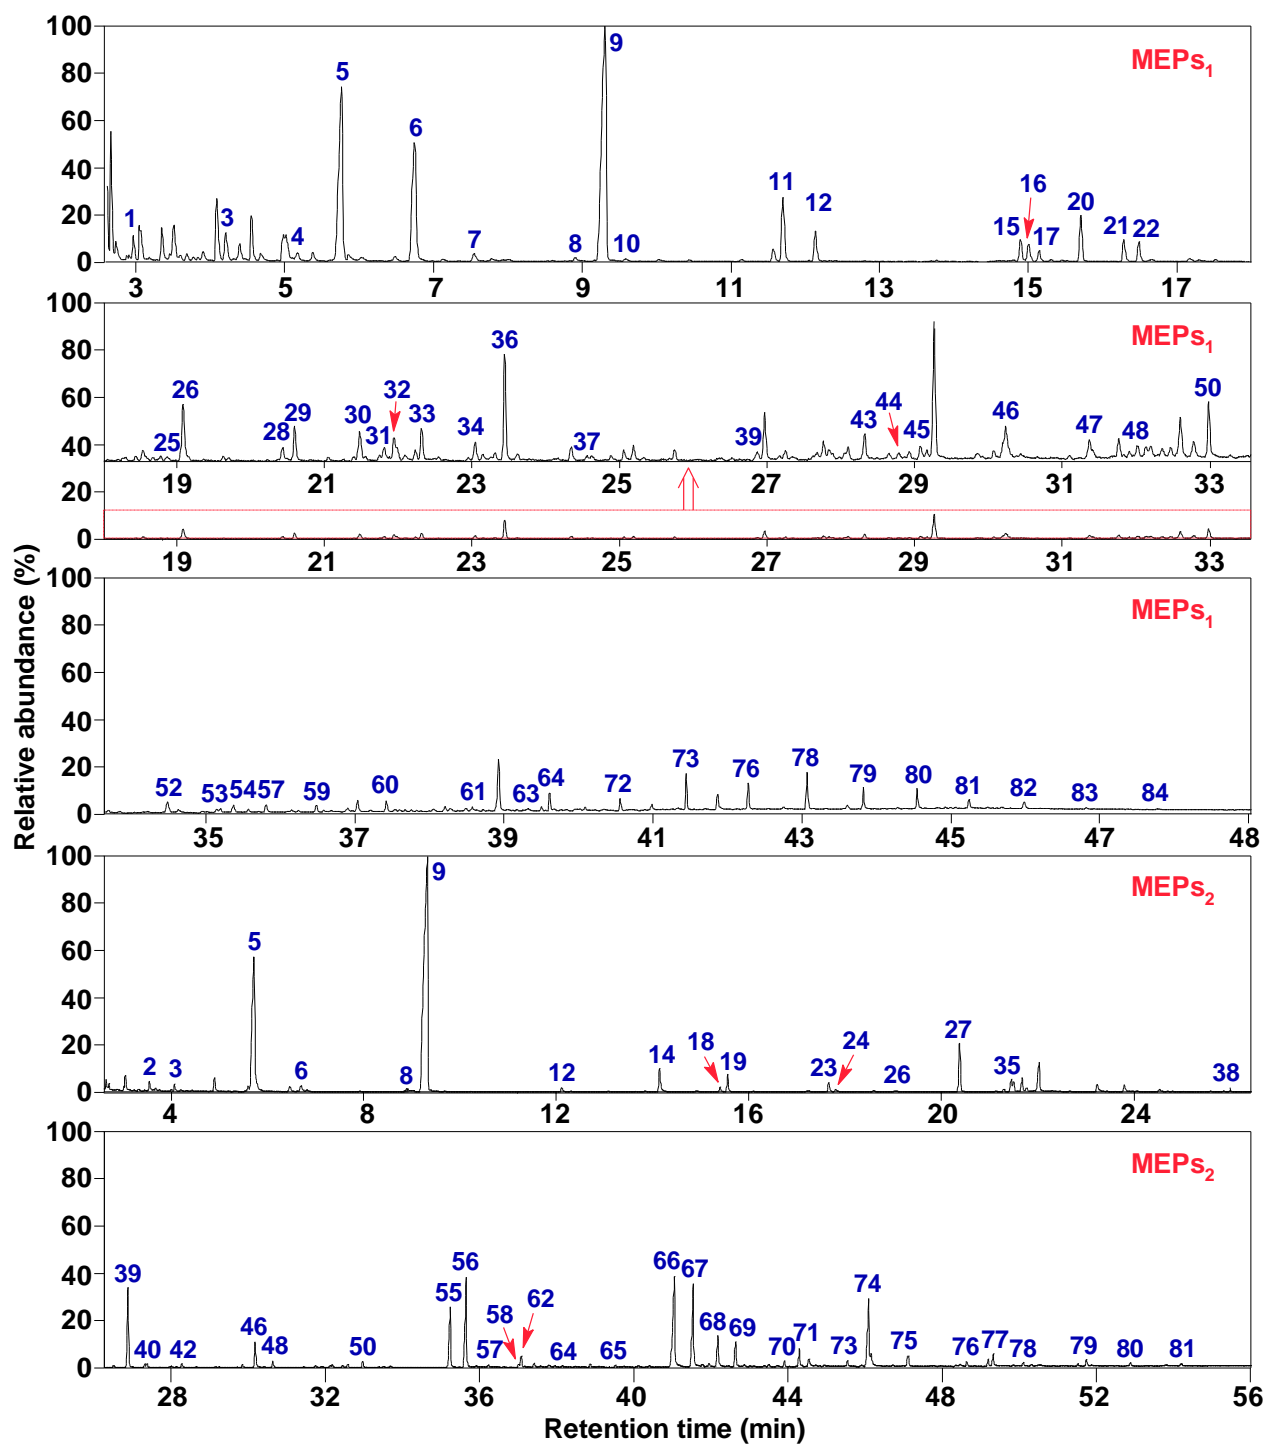

Figure S2 Total ion chromatograms of  $P_{SFB}$

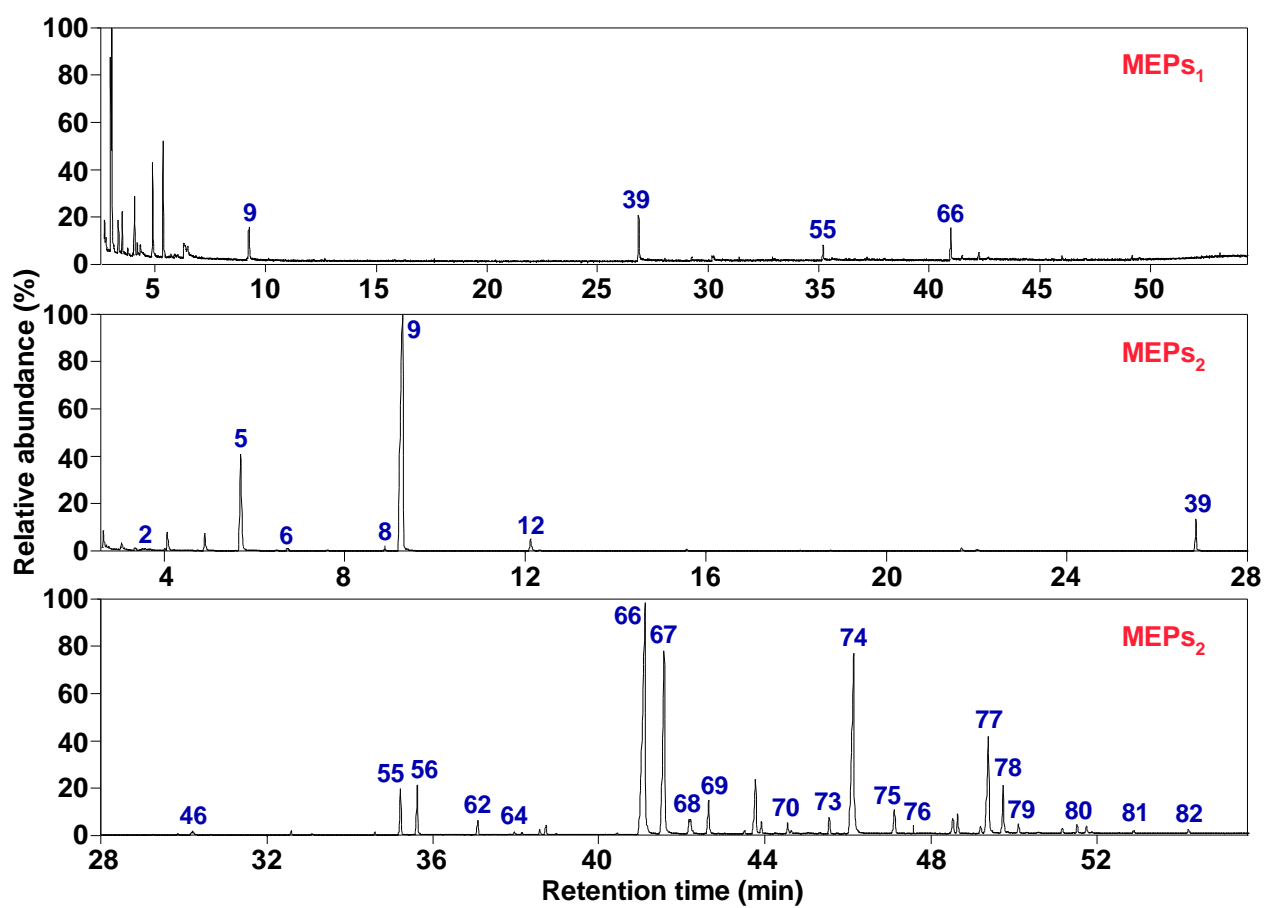

**Figure S3** Total ion chromatograms of P<sub>JCA</sub>
